# Supplementary material for: Inferring microbial co-occurrence networks from amplicon data: a systematic evaluation
Source: PubMed Central journal article supplement (PMC10469762; doi:10.1128/msystems.00961-22), 2023-06-20
Supplement: msystems.00961-22-s0009.pdf [file msystems.00961-22-s0009.pdf]

| DC | CC     | TA    | OP  | NI         | Average shortest path length | Average clustering | No. of connected components | Modularity | Node connectivity | Degree assortativity coefficient |
|----|--------|-------|-----|------------|------------------------------|--------------------|-----------------------------|------------|-------------------|----------------------------------|
| DB | -      | -     | -   | -          | 2.066                        | 0.265              | 27.088                      | 0.387      | 1.868             | 0.070                            |
| OR | -      | -     | -   | -          | 1.904                        | 0.273              | 24.868                      | -17.060    | 1.877             | 0.099                            |
| D2 | -      | -     | -   | -          | 2.263                        | 0.267              | 28.228                      | 0.326      | 1.789             | 0.078                            |
| DN | -      | -     | -   | -          | 2.065                        | 0.272              | 25.132                      | 0.302      | 1.754             | 0.093                            |
| CR | -      | -     | -   | -          | 1.937                        | 0.276              | 24.289                      | -1.865     | 2.079             | 0.097                            |
| -  | remove | -     | -   | -          | 2.070                        | 0.272              | 25.968                      | -7.439     | 1.863             | 0.086                            |
| -  | bimera | -     | -   | -          | 2.066                        | 0.269              | 25.874                      | 0.275      | 1.884             | 0.089                            |
| -  | uchime | -     | -   | -          | 2.218                        | 0.262              | 22.784                      | -3.683     | 1.495             | 0.100                            |
| -  | -      | NCBI  | -   | -          | 1.872                        | 0.275              | 30.716                      | 0.415      | 2.674             | 0.074                            |
| -  | -      | SILVA | -   | -          | 2.086                        | 0.274              | 24.263                      | -7.478     | 1.453             | 0.088                            |
| -  | -      | GG    | -   | -          | 1.975                        | 0.252              | 18.493                      | -7.194     | 1.880             | 0.073                            |
| -  | -      | -     | On  | -          | 2.193                        | 0.291              | 34.174                      | 0.431      | 1.867             | 0.104                            |
| -  | -      | -     | Off | -          | 1.650                        | 0.528              | 1.000                       | 0.000      | 10.583            | 0.036                            |
| -  | -      | -     | -   | propr      |                              | 0.108              | 82.633                      | 0.757      | 0.000             | 0.340                            |
| -  | -      | -     | -   | harmonies  |                              | 0.079              | 1.800                       | 0.458      | 0.383             | -0.032                           |
| -  | -      | -     | -   | flashweave | 3.878                        | 0.090              | 82.167                      | 0.694      | 0.000             | -0.072                           |
| -  | -      | -     | -   | cozine     |                              | 0.092              | 11.767                      | 0.566      | 0.000             | -0.035                           |
| -  | -      | -     | -   | spring     |                              | 0.525              | 1.033                       | 0.009      | 5.500             | -0.011                           |
| -  | -      | -     | -   | sparcc     | 1.747                        | 0.076              | 39.383                      | 0.717      | 0.000             | -0.031                           |
| -  | -      | -     | -   | spieceasi  |                              | 0.457              | 23.883                      | 0.551      | 0.000             | 0.478                            |
| -  | -      | -     | -   | pearson    |                              | 0.551              | 1.450                       | 0.044      | 1.117             | 0.170                            |
| -  | -      | -     | -   | spearman   | 1.875                        | 0.130              | 2.267                       | -75.648    | 0.433             | -0.028                           |
| -  | -      | -     | -   | mldm       | 2.760                        |                    |                             |            |                   |                                  |
